# Supplementary material
Source: PubMed Central journal article supplement (PMC5028277)
Supplement: NIHMS806313-supplement-Supplementary_Data.pdf [file NIHMS806313-supplement-Supplementary_Data.pdf]

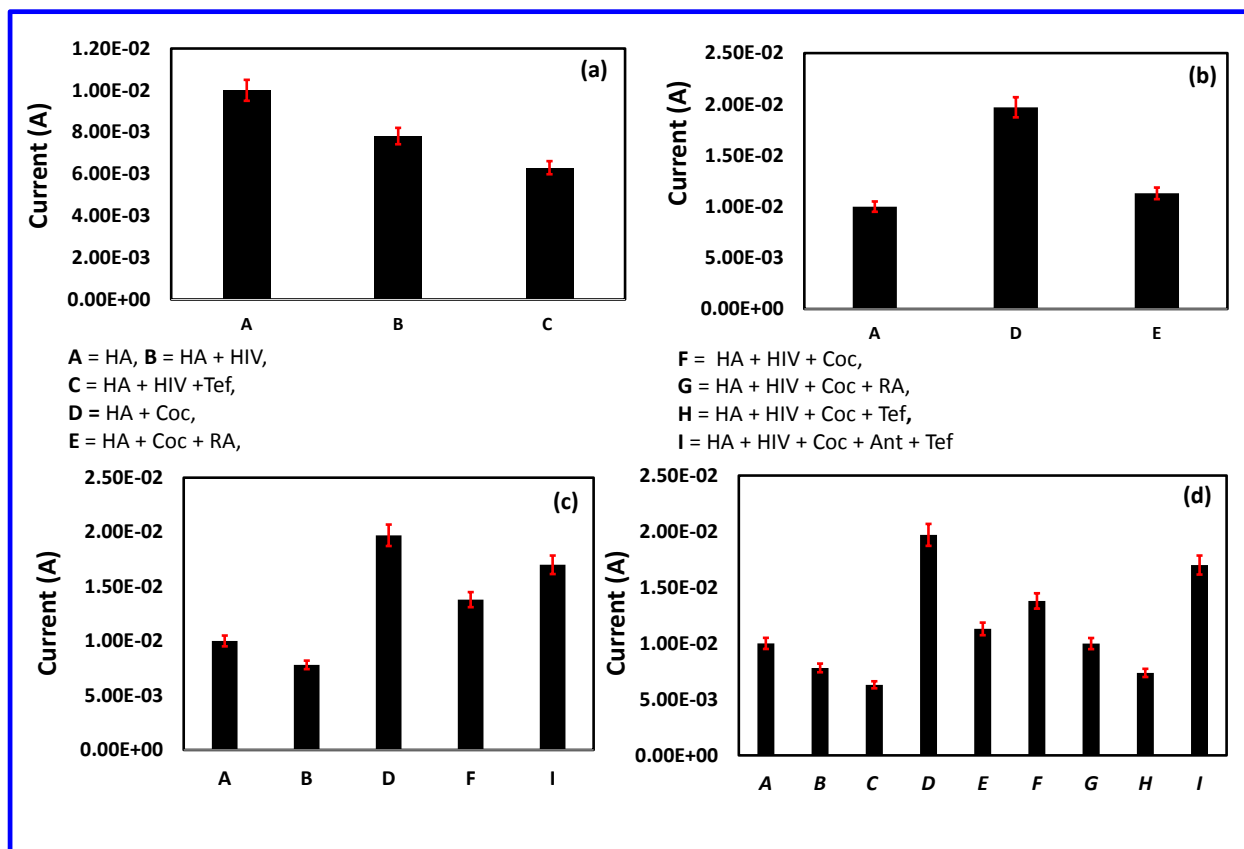

**Supplimentary figure 1.** CV measurement of CC treated with HA, HIV, Coc, Tef, RA and all together. 1<sup>st</sup> –well HA=A, 2<sup>nd</sup> –well HA & HIV = B, 3<sup>rd</sup> –well HA & HIV + Tef = C, 4<sup>th</sup> –well HA & Coc =D, 5<sup>th</sup> –well HA & Coc + RA = E, 6<sup>th</sup> –well HA & HIV & Coc = F, 7<sup>th</sup> –well HA & HIV & Coc + RA = G, 8<sup>th</sup> –well HA & HIV & Coc + Tef. = H, 9<sup>th</sup> –well HA & HIV & Coc + Tef +RA =I  
**(a)** HA, HA & HIV-infection, HA & HIV-infection + Tef. **(b)** HA & Coc, HA & Coc + RA, **(c)** HA, HA & HIV-infection, HA & Coc, HA & HIV & Coc, HA & HIV-infection & Coc + RA + Tef. **(d)** in 400  $\mu$ L of 5mM PBS (pH 7.4) containing 5 mM Fe (II)/Fe(III), as redox moieties. The EIS measurements were performed in 400  $\mu$ L of 5mM PBS (pH 7.4) containing 5 mM Fe (II)/Fe(III), as redox moieties. The results of EIS studies were validated using CV technique.
